# Supplementary material for: Theoretical study of initial decomposition process of NTO dimer
Source: Royal Society of Chemistry journal article supplement (doi:10.1039/b101745o), 2001-01-01
Supplement: table.pdf [file table.pdf]

**Table S-1: Calculated Vibrational Frequencies of the Transition State at the B3LYP/6-31G(d,p) Level of Theory<sup>a</sup>****TS(I)**

-480, 3, 30, 37, 64, 71, 98, 139, 156, 189, 207, 238, 276, 325, 375, 403, 423,  
462, 485, 494, 507, 572, 579, 582, 623, 695, 699, 710, 731, 732, 754, 784, 815, 826,  
914, 934, 951, 1001, 1069, 1073, 1088, 1180, 1242, 1265, 1367, 1381, 1386, 1461, 1467, 1509, 1566,  
1652, 1679, 1867, 1919, 2394, 3588, 3646, 3677,

**TS(II)**

-346, 61, 126, 205, 254, 366, 404, 431, 473, 550, 587, 614, 701, 751, 809, 836, 887, 984,  
998, 1075, 1195, 1207, 1337, 1392, 1470, 1667, 1693, 1896, 3430, 3668,

**TS(III)**

-437, 63, 101, 121, 181, 268, 297, 382, 454, 490, 543, 584, 688, 719, 763, 798, 841,  
885, 976, 1139, 1215, 1358, 1388, 1405, 1512, 1639, 1688, 1950, 3368, 3542,

**TS(IV)**

-1155, 113, 183, 255, 320, 439, 539, 569, 698, 763, 846, 900, 1108, 1138, 1296, 1470, 1696,  
1842, 1933, 3492,

**TS(V)**

-525, 105, 297, 432, 447, 564, 646, 749, 847, 900, 1339, 1576, 1905, 3534, 3668,

<sup>a</sup> All frequencies are in  $\text{cm}^{-1}$ , and the negative numbers indicate imaginary frequencies

**Table S-2****Total Energies (hartrees) and Zero-Point Energies(kcal mol<sup>-1</sup>) for Reactant, Products, and Transition State (6-31G Level)**

| <b>Molecule</b>                                                                                                | <b>Total Energies</b> | <b>ZEP</b>      |
|----------------------------------------------------------------------------------------------------------------|-----------------------|-----------------|
| <b>NTO isolated molecule</b>                                                                                   | <b>-518.85093</b>     | <b>45.88419</b> |
| <b>NTO 2 molecule (Optimized)</b>                                                                              | <b>-1037.71682</b>    | <b>92.57786</b> |
| <b>NO(CN<sub>3</sub>H<sub>2</sub>CO) (nitroso-TO)</b>                                                          | <b>-444.08140</b>     | <b>42.50166</b> |
| <b>NO<sub>2</sub>(CN<sub>3</sub>OH<sub>2</sub>CO)(a new triazole)</b>                                          | <b>-593.57948</b>     | <b>48.05280</b> |
| <b>[2NTO → NO(CN<sub>3</sub>H<sub>2</sub>CO) + NO<sub>2</sub>(CN<sub>3</sub>OH<sub>2</sub>CO)]<sup>‡</sup></b> | <b>-1037.62722</b>    | <b>90.35878</b> |
